# Supplementary material
Source: PubMed Central journal article supplement (PMC5989851)
Supplement: EMBR-19-e44951-s001.pdf [file EMBR-19-e44951-s001.pdf]

## Expanded View Figures

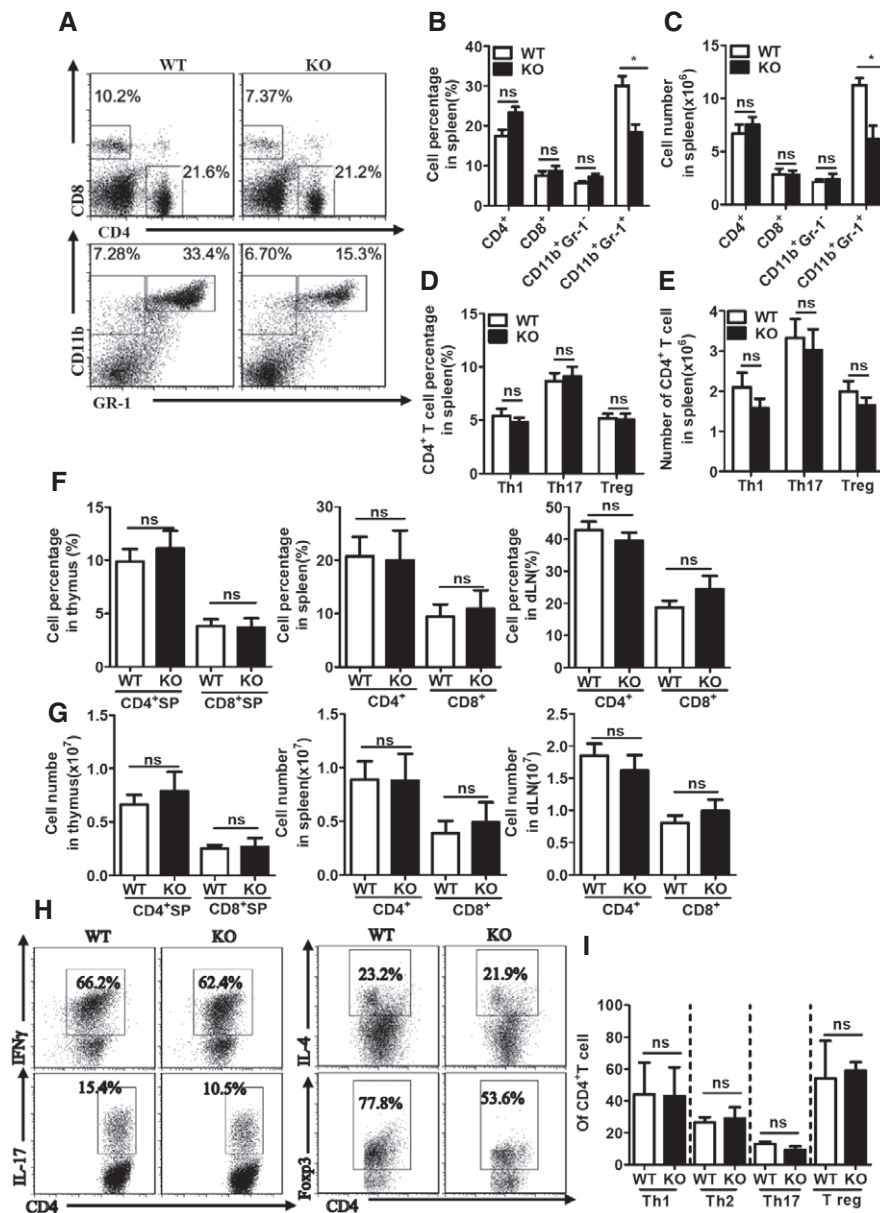

**Figure EV1. RKIP deficiency has no effect on T cell development, polarization, and immune cell composition in the spleen from EAE mice.**

A–C Immune cells isolated from spleen of day 31 MOG<sub>35–55</sub>-immunized WT and *RKIP*-KO mice were stained with mouse anti-CD4, anti-CD8, anti-CD11b, and anti-Gr-1 antibodies and analyzed by flow cytometry (FACS; WT *n* = 6, KO *n* = 5). Data are presented as the representative plot (A), summary graph of the percentages of cells (B), and the absolute numbers of cells (C).

D, E T-helper cells isolated from spleen of day 31 MOG<sub>35–55</sub>-immunized WT and *RKIP*-KO mice were fixed and permeabilized, and the CD4<sup>+</sup> T cells were analyzed by flow cytometry to measure intracellular IFN- $\gamma$ , IL-17, and Foxp3. Data are presented in summary graphs of percentages (D) and absolute cell numbers (E) (WT *n* = 6, KO *n* = 5).

F, G T cells from thymus, spleen, and dLNs of WT and *RKIP*-KO mice (*n* = 5/per group) were analyzed with anti-CD4 and anti-CD8 staining.

H, I The naïve CD4<sup>+</sup> T cells were polarized under the Th1, Th2, Th17, or Treg condition, respectively, and 5 days later, the CD4<sup>+</sup> T cells were fixed and permeabilized, followed by flow cytometry to measure intracellular IFN- $\gamma$ , IL-4, IL-17, and Foxp3. Data are presented as the representative plot (H) and summary graph of the percentages of cells (I), Th1 (*n* = 4), Th2 (*n* = 2), Th17 (*n* = 4), and Treg (*n* = 2).

Data information: \**P* < 0.05; ns, no significant difference (unpaired, two-tailed Student's *t*-test). Data are representative of three independent experiments with similar results. Data are means  $\pm$  SEM values.

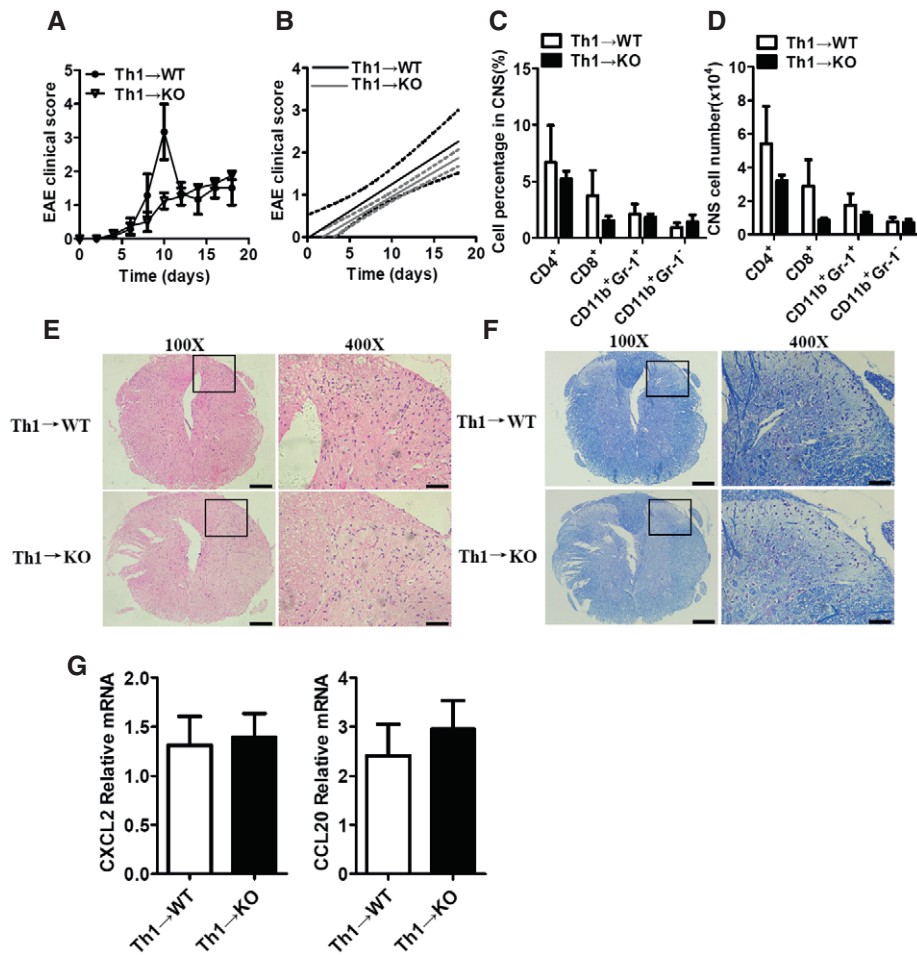

**Figure EV2. RKIP deficiency does not affect Th1 cells passive transferring-induced EAE.**

- A The mean EAE clinical scores of  $\gamma$ -irradiated (5Gy/c) WT and *RKIP-KO* mice (WT  $n = 3$ , KO  $n = 4$ ) reconstituted with WT MOG<sub>35-55</sub>-pre-sensitized Th1 cells were determined from day 0 to day 18 after Th1-cell transfer.
- B Linear regression curves of (A) dashed lines indicate the 95% confidence intervals of the regression lines.
- C, D Summary graph of the percentages of cells (C) and the absolute numbers of cells (D) in the CNS. CNS-infiltrating cells isolated from mice treated as in (A) on day 18 after the Th1-cell transfer was stained with the appropriate antibody.
- E, F Histology of the spinal cord from mice reconstituted with Th1 cells was analyzed by H&E (E) and LFB (F) staining of spinal cord sections from mice reconstituted with Th1 cells. Scale bars (a whole spinal cord, 100X), 200  $\mu$ m; scale bars (a portion of the spinal cord, 400X), 50  $\mu$ m. Typical stainings in the black box region were magnified and shown in 400X panel.
- G Real-time PCR analysis of *CXCL2* and *CCL20* mRNA expression in the CNS tissues of WT and *RKIP-KO* mice treated as in (A).

Data information: Data are representative of two independent experiments with similar results.

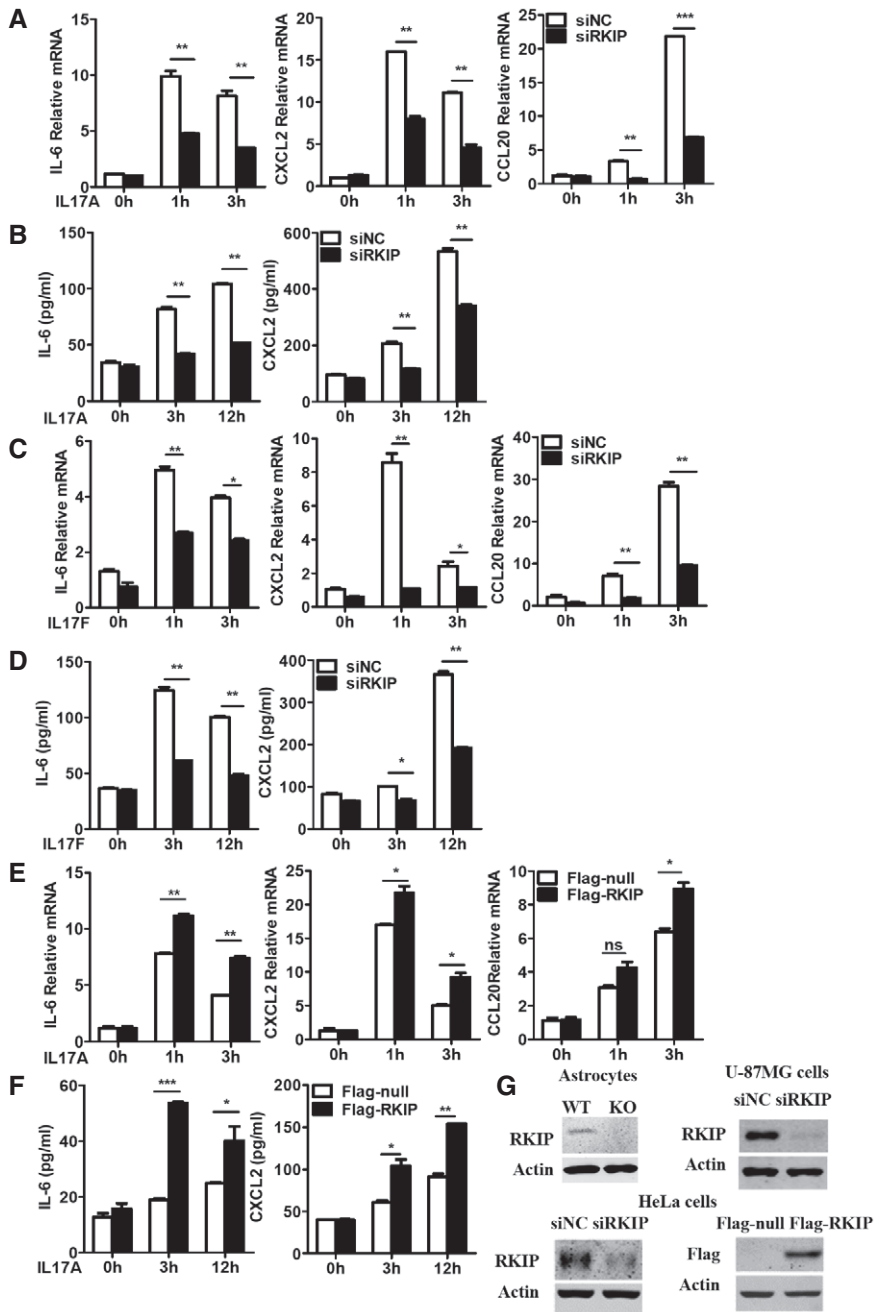

**Figure EV3. RKIP positively regulates IL-17A/F-induced proinflammatory cytokine and chemokine expression in HeLa cells.**

A, B HeLa cells were transfected with RKIP-specific siRNA (siRKIP) or negative control siRNA (siNC), and then, the cells stimulated with IL-17A ( $50 \text{ ng ml}^{-1}$ ) for the indicated time. IL-6, CXCL2, and CCL20 mRNA expression (A) and protein production (B) were analyzed by real-time PCR and ELISA, respectively.

C, D HeLa cells were transfected with RKIP-specific siRNA (siRKIP) or negative control siRNA (siNC), and then, the cells stimulated with IL-17F ( $50 \text{ ng ml}^{-1}$ ) for the indicated time. IL-6, CXCL2, and CCL20 mRNA expression (C) and protein production (D) were analyzed by real-time PCR and ELISA, respectively.

E, F Flag-tagged RKIP-expressing or control mock (Flag-tagged null) plasmid-transfected HeLa cells were stimulated with IL-17A ( $50 \text{ ng ml}^{-1}$ ) for indicated time.

G Immunoblot analysis of RKIP protein expression in all of knockout, knockdown, and overexpression experiments.

Data information: \* $P < 0.05$ , \*\* $P < 0.01$ , \*\*\* $P < 0.001$ ; ns, no significant difference (unpaired, two-tailed Student's *t*-test). Data are representative of three independent experiments with similar results. Data are means  $\pm$  SEM values.

Source data are available online for this figure.

**Figure EV4. RKIP silencing has no effect on TNF- $\alpha$ -, IL-1 $\beta$ -, and LPS-induced proinflammatory cytokine and chemokine expression in HeLa cells.**

A–C HeLa cells were transfected with RKIP-specific siRNA (siRKIP) or negative control siRNA (siNC), and then, the cells stimulated with TNF- $\alpha$  ( $20 \text{ ng ml}^{-1}$ ) (A), IL-1 $\beta$  ( $20 \text{ ng ml}^{-1}$ ) (B), and LPS ( $100 \text{ ng ml}^{-1}$ ) (C) for the indicated time. IL-6, CXCL2, and CCL20 mRNA expression was analyzed by real-time PCR.

D HeLa cells were transfected with Flag-tagged RKIP or Flag-null control plasmids and then treated with  $50 \text{ ng ml}^{-1}$  IL-17A for the indicated time. The WCLs were subsequently immunoblotted with the indicated antibodies.

E–G HeLa cells were transfected with RKIP-specific siRNA (siRKIP) or negative control siRNA (siNC) and treated with TNF- $\alpha$  ( $20 \text{ ng ml}^{-1}$ ) (E), IL-1 $\beta$  ( $20 \text{ ng ml}^{-1}$ ) (F), and LPS ( $100 \text{ ng ml}^{-1}$ ) (G) for the indicated time, and then, the WCLs were immunoblotted with the indicated antibodies.

Data information: ns, no significant difference (unpaired, two-tailed Student's *t*-test). Data are representative of three independent experiments with similar results. Data are means  $\pm$  SEM values.

Source data are available online for this figure.

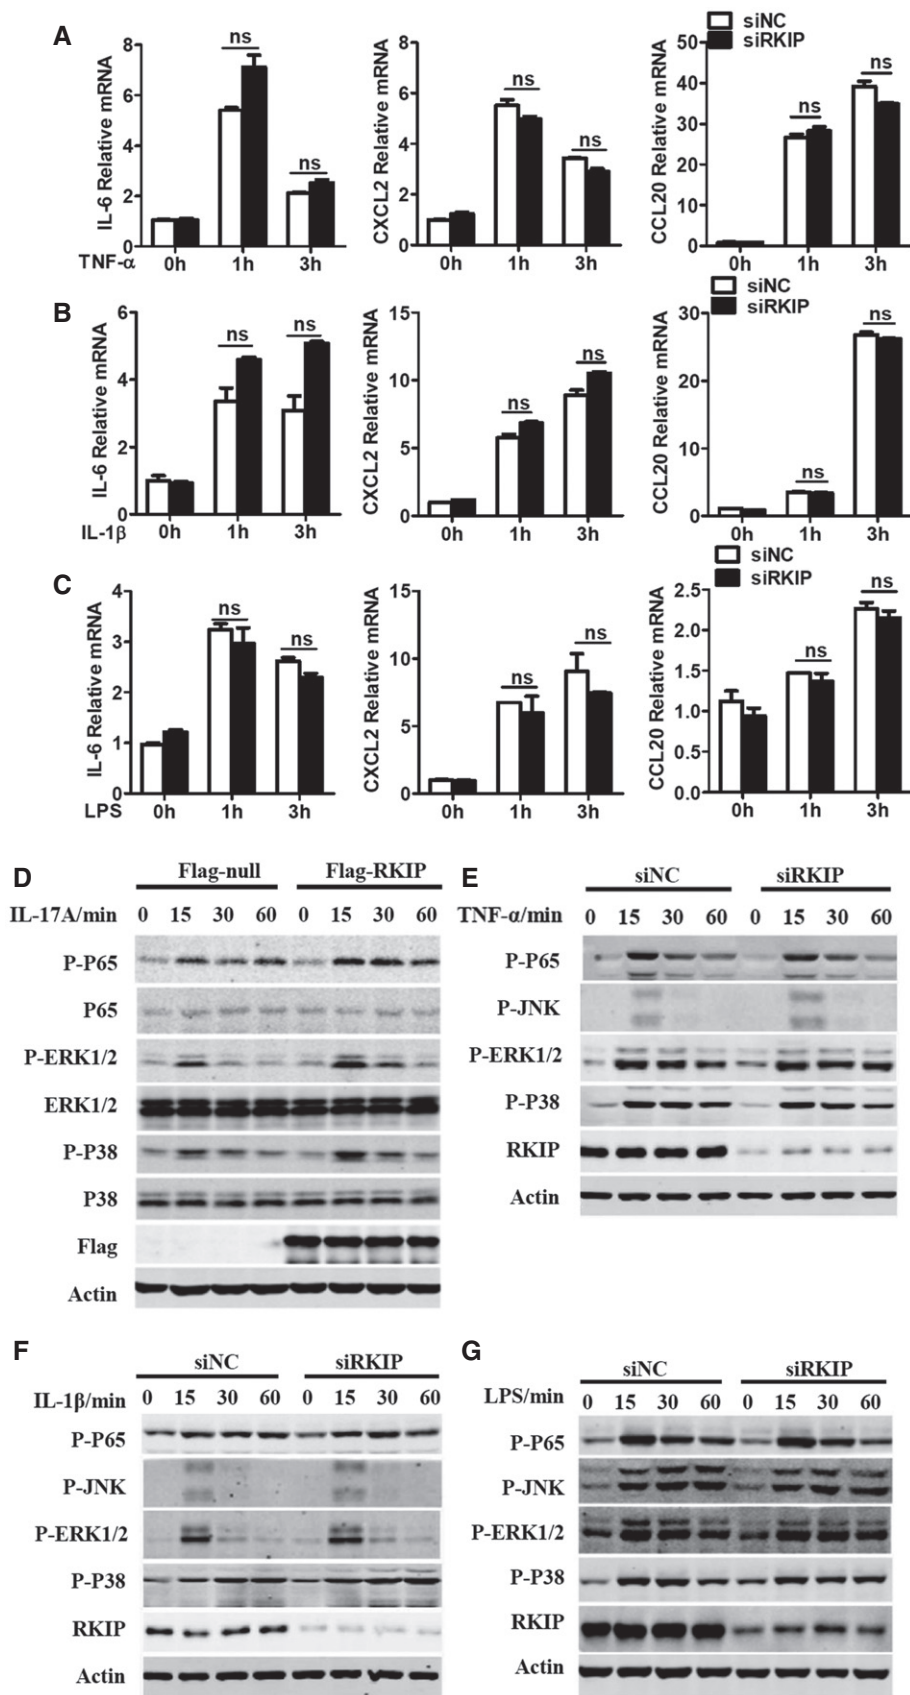

Figure EV4.

**Figure EV5. RKIP interacts with Act1 and IL-17RA and promotes the formation of IL-17RA-Act1 complex.**

- A Schematic diagram of Act1 deletion mutants. Flag-tagged null, Flag-tagged full-length Act1, Flag-tagged Act1-SEFIR (400–555), or Flag-tagged Act1- $\Delta$ SEFIR (1–400) mutants were co-expressed with Myc-tagged RKIP in HEK293T cells, and the lysates from the transfected cells were immunoprecipitated (IP) with anti-Flag beads and then subjected to immunoblot analysis with the indicated antibodies. Asterisk (\*) indicates the target band.
- B Schematic diagram of IL-17RA deletion mutants. HA-tagged null, HA-tagged full-length IL-17RA, HA-tagged IL-17RA- $\Delta$ TiLL ( $\Delta$ 532–553), HA-tagged IL-17RA- $\Delta$ Distal (1–553), HA-tagged IL-17RA- $\Delta$ SEFIR ( $\Delta$ 379–536), or HA-tagged IL-17RA-SEFIR (379–536) mutants were co-expressed with Myc-tagged RKIP in HEK293T cells, and the lysates from the transfected cells were immunoprecipitated (IP) with anti-HA beads and then subjected to immunoblot analysis with the indicated antibodies. Asterisk (\*) indicates the target band.
- C, D HEK293T cells were transfected with HA-tagged IL-17RA and Flag-tagged Act1 with or without HA-tagged RKIP (C) or with or without RKIP-specific siRNA (D). The lysates from the transfected cells were immunoprecipitated (IP) with anti-Flag beads and then subjected to immunoblot analysis with the indicated antibodies.
- E siRKIP- or siNC-transfected Hela cells were pretreated with TNF- $\alpha$  (20 ng ml<sup>-1</sup>) for 1 h, followed by treatment (horizontal axes) with actinomycin D (5  $\mu$ g ml<sup>-1</sup>) alone or actinomycin D plus IL-17 (25 ng ml<sup>-1</sup>) for the indicated time and then were subjected to real-time PCR analysis of CXCL1 mRNA expression. \**P* < 0.05 (unpaired, two-tailed Student's *t*-test). Data are representative of three independent experiments with similar results. Data are means  $\pm$  SEM values.

Source data are available online for this figure.

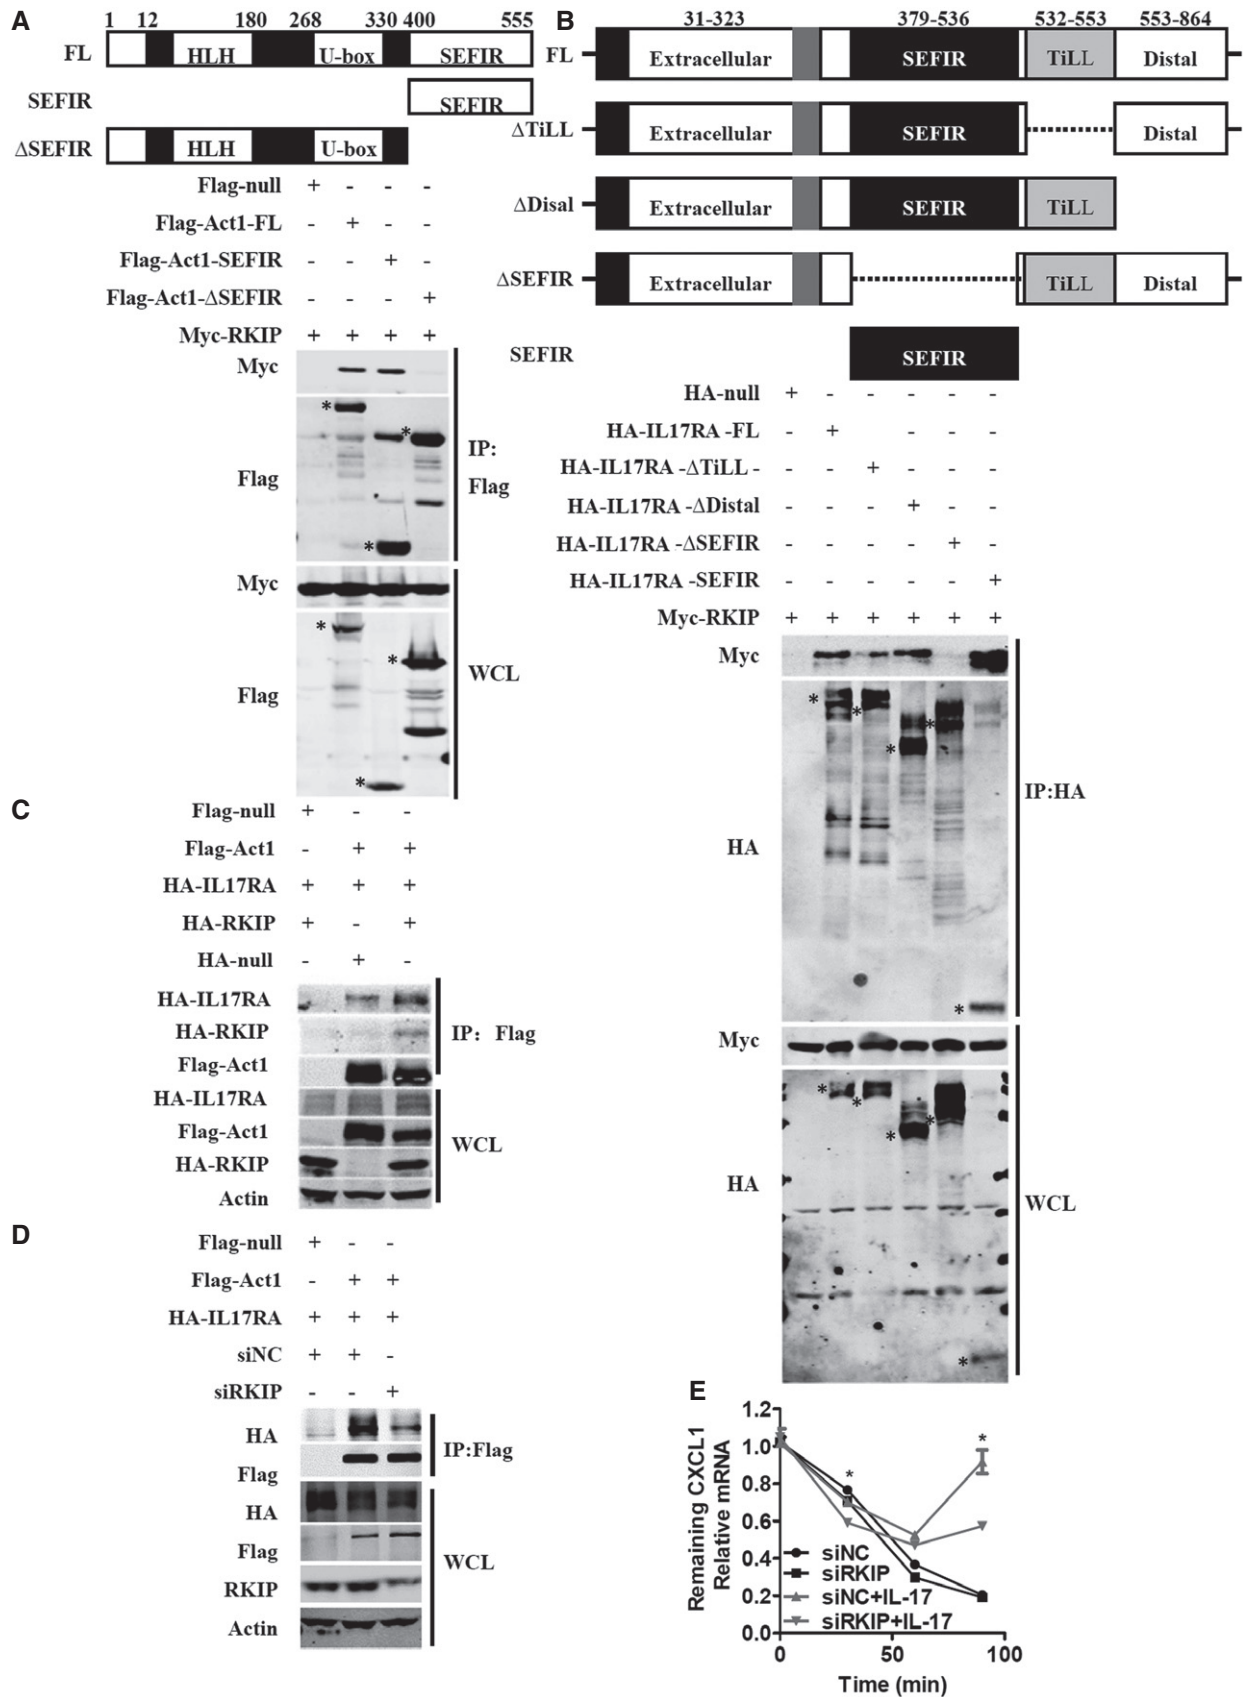

Figure EV5.

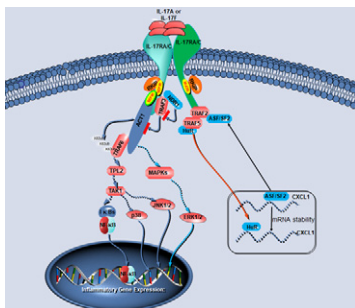

**Figure EV6. Mechanism schematic diagram of RKIP regulating IL-17R signaling.**

Upon binding with IL-17A or IL-17F, IL-17R cytoplasm domain recruits the adaptor protein Act1. RKIP functions as an important adaptor protein to promote Act1 to IL-17R in a SEFIR domain-dependent manner. Activated Act1 mediates the downstream signaling in a TRAF6-dependent or TRAF6-independent manner to regulate signaling transduction and gene expression of cytokines or chemokines.
