# Supplementary material
Source: PubMed Central journal article supplement (PMC5989851)

Figure 5

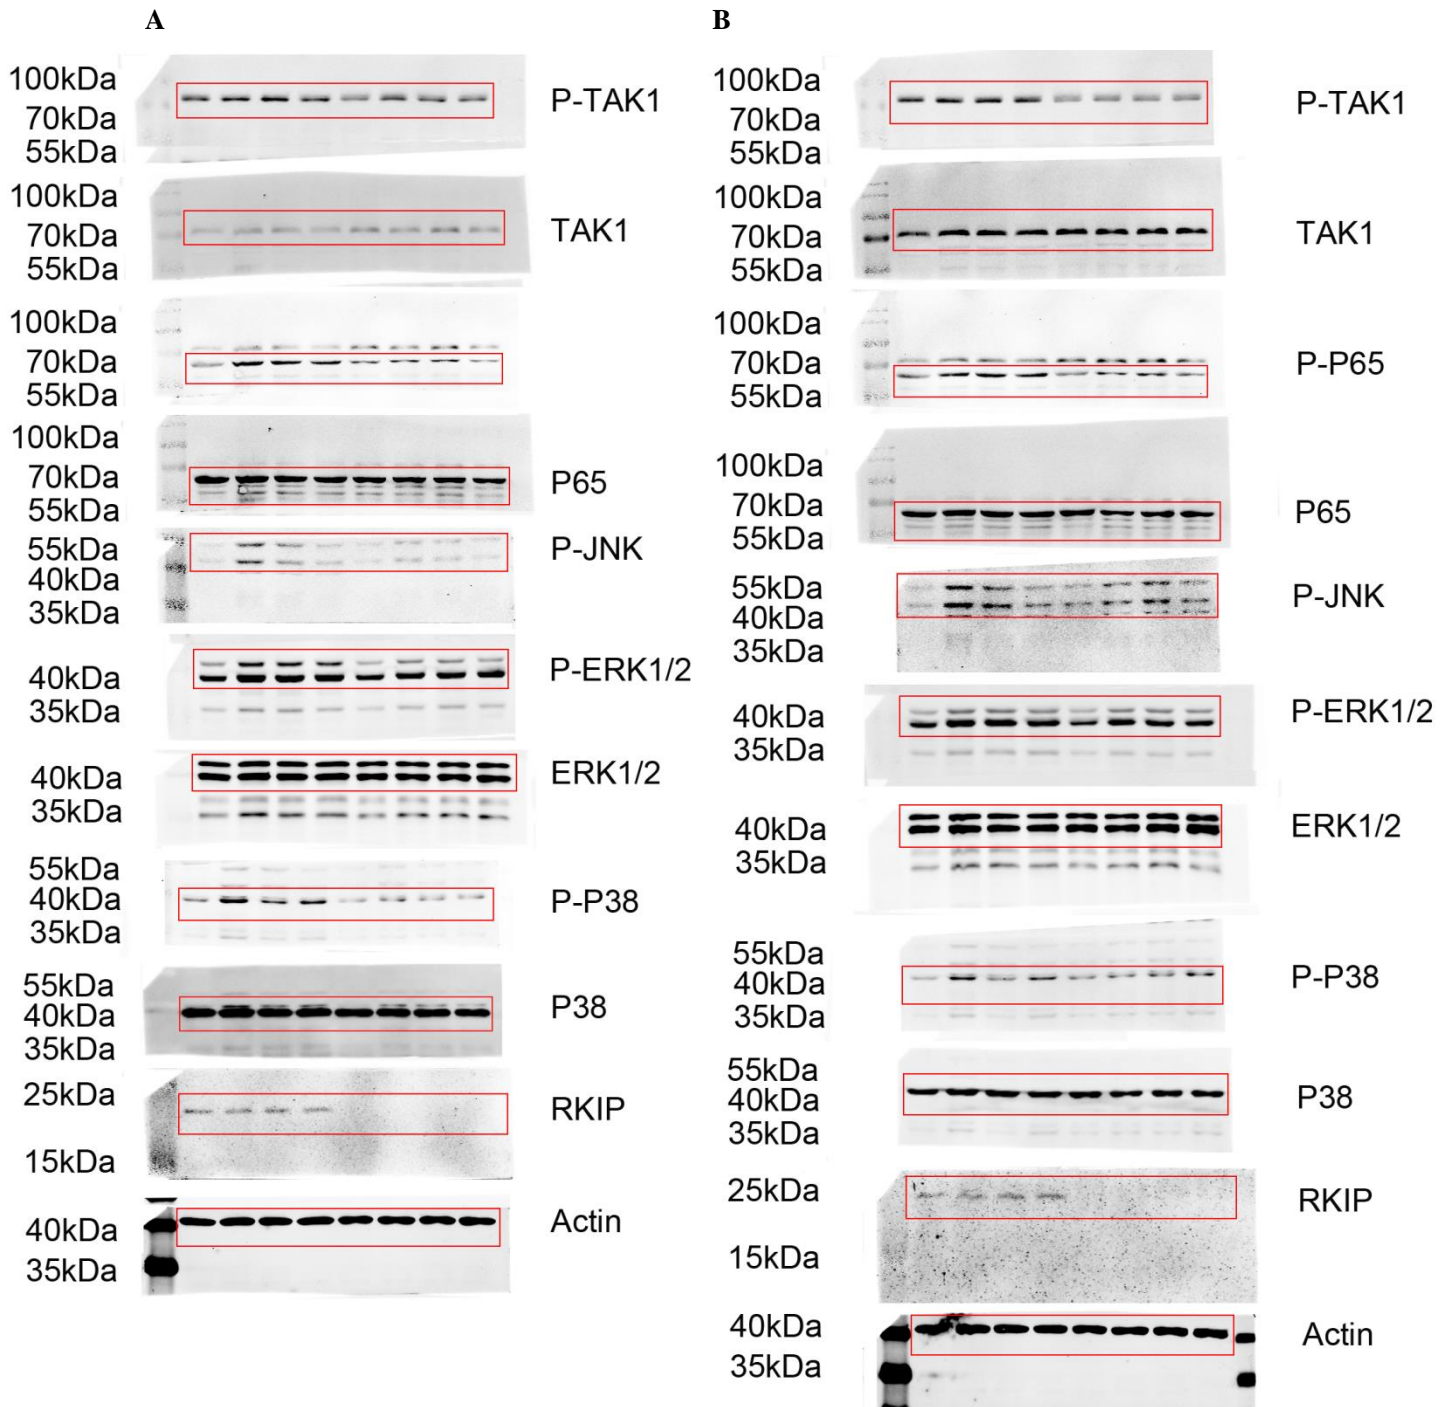

**C**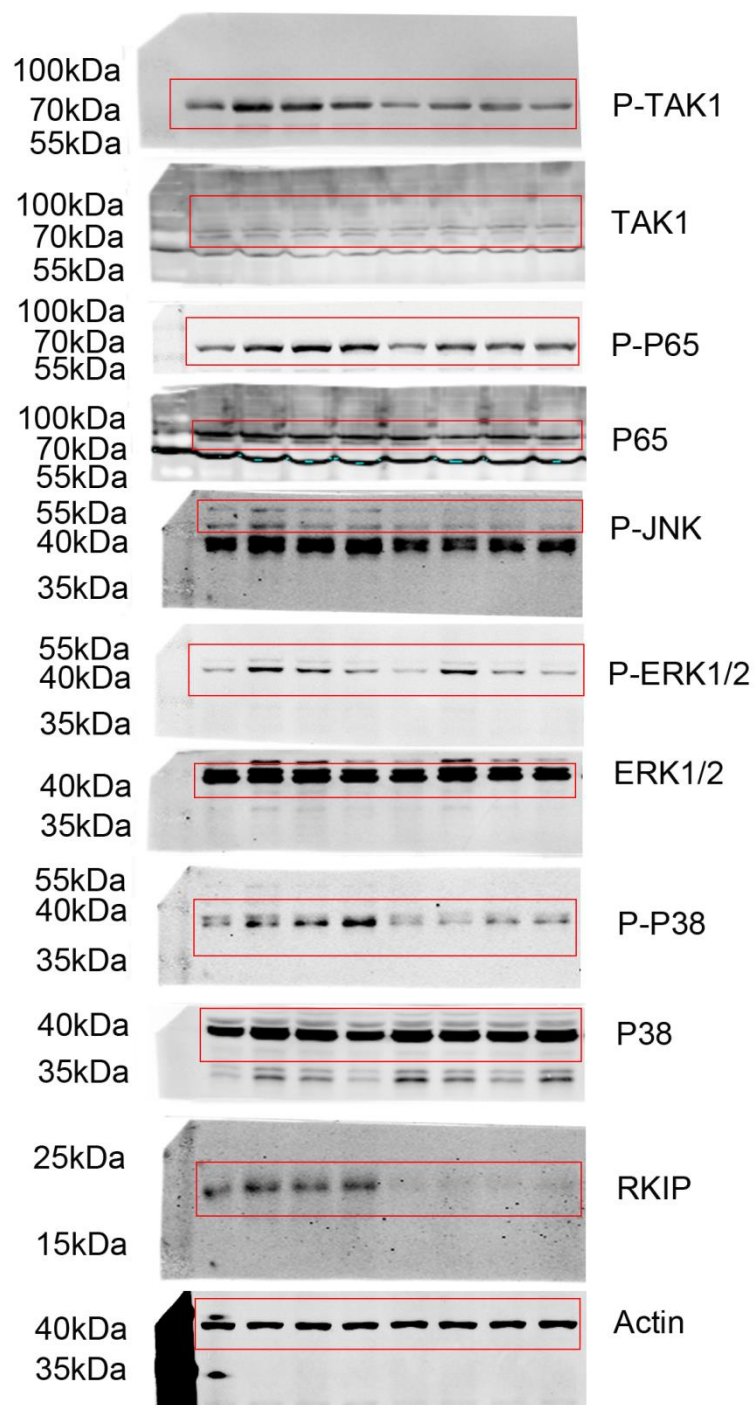**D**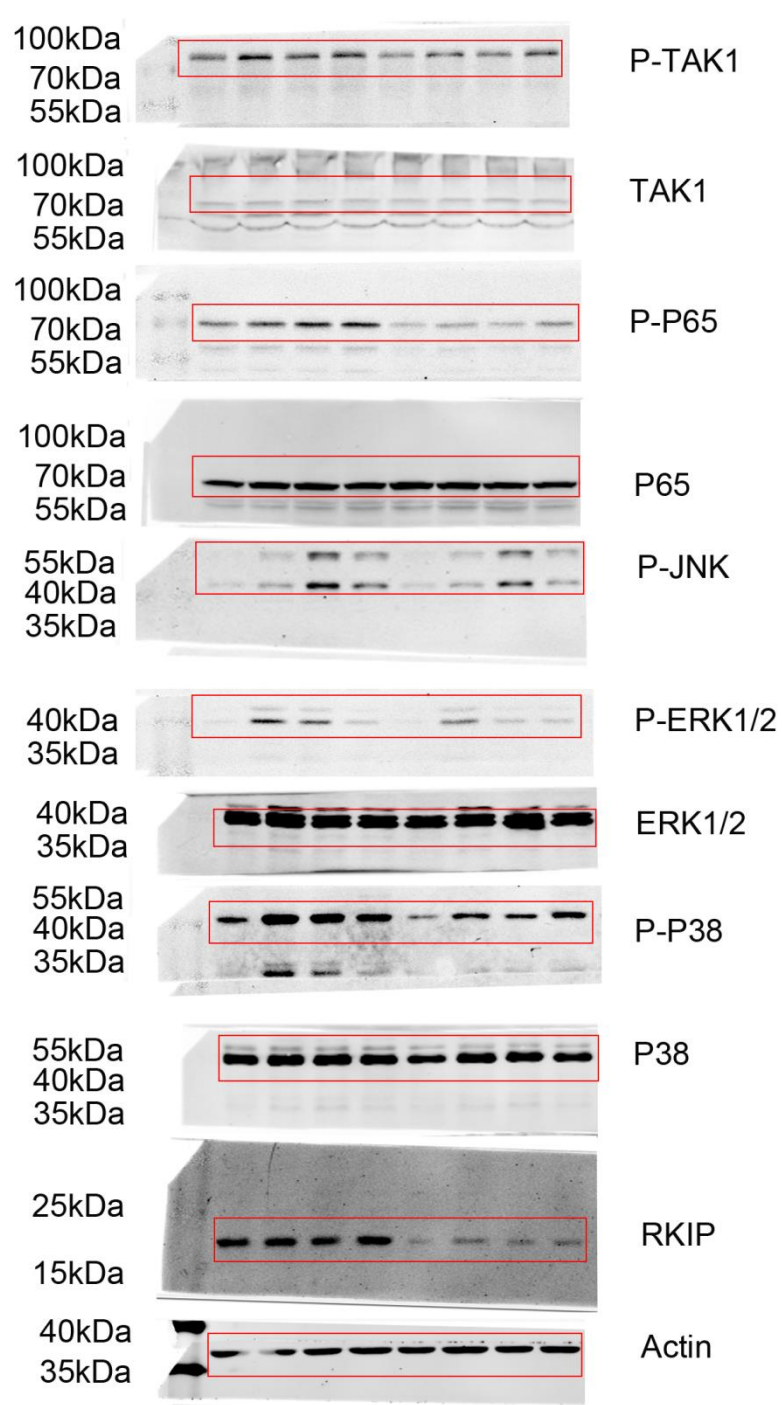

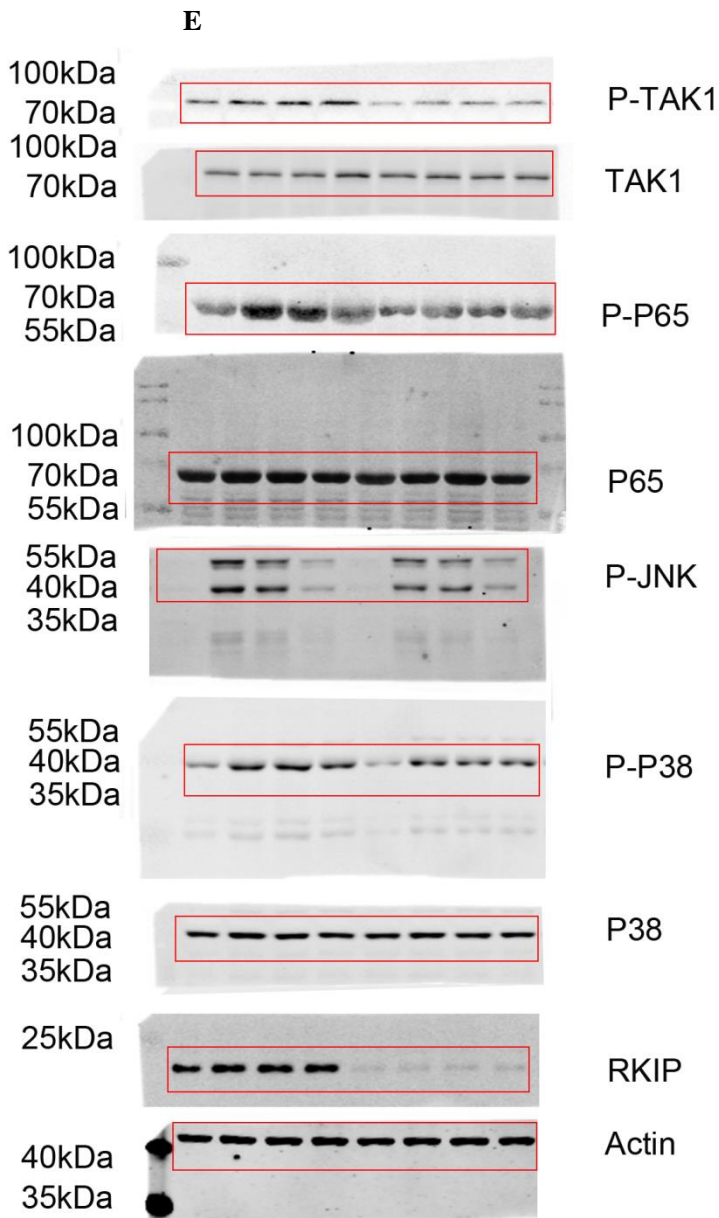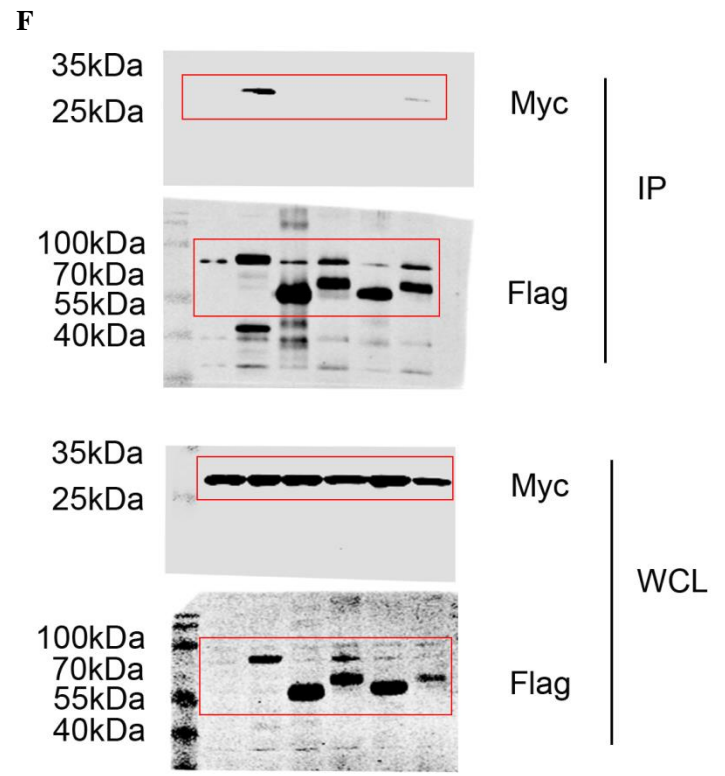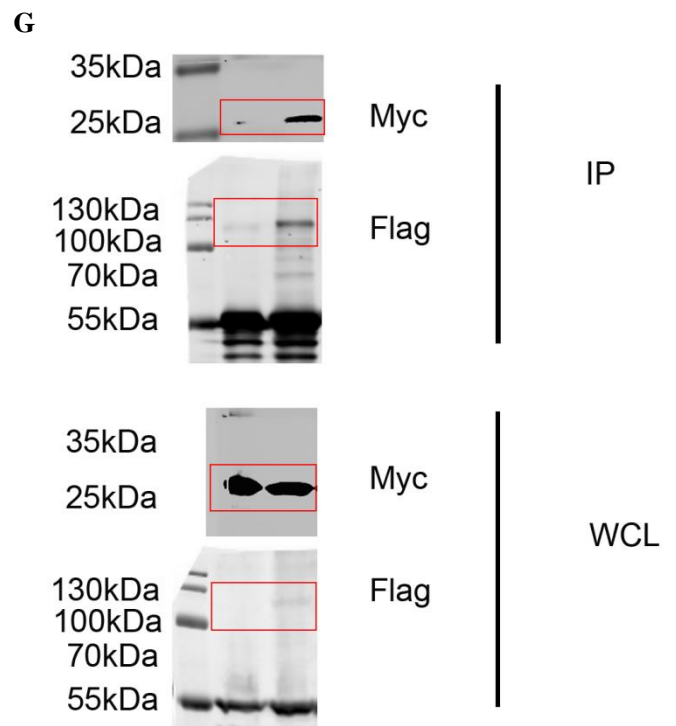

Supplement: EMBR-19-e44951-s003.pdf [file EMBR-19-e44951-s003.pdf]

**Figure 6**

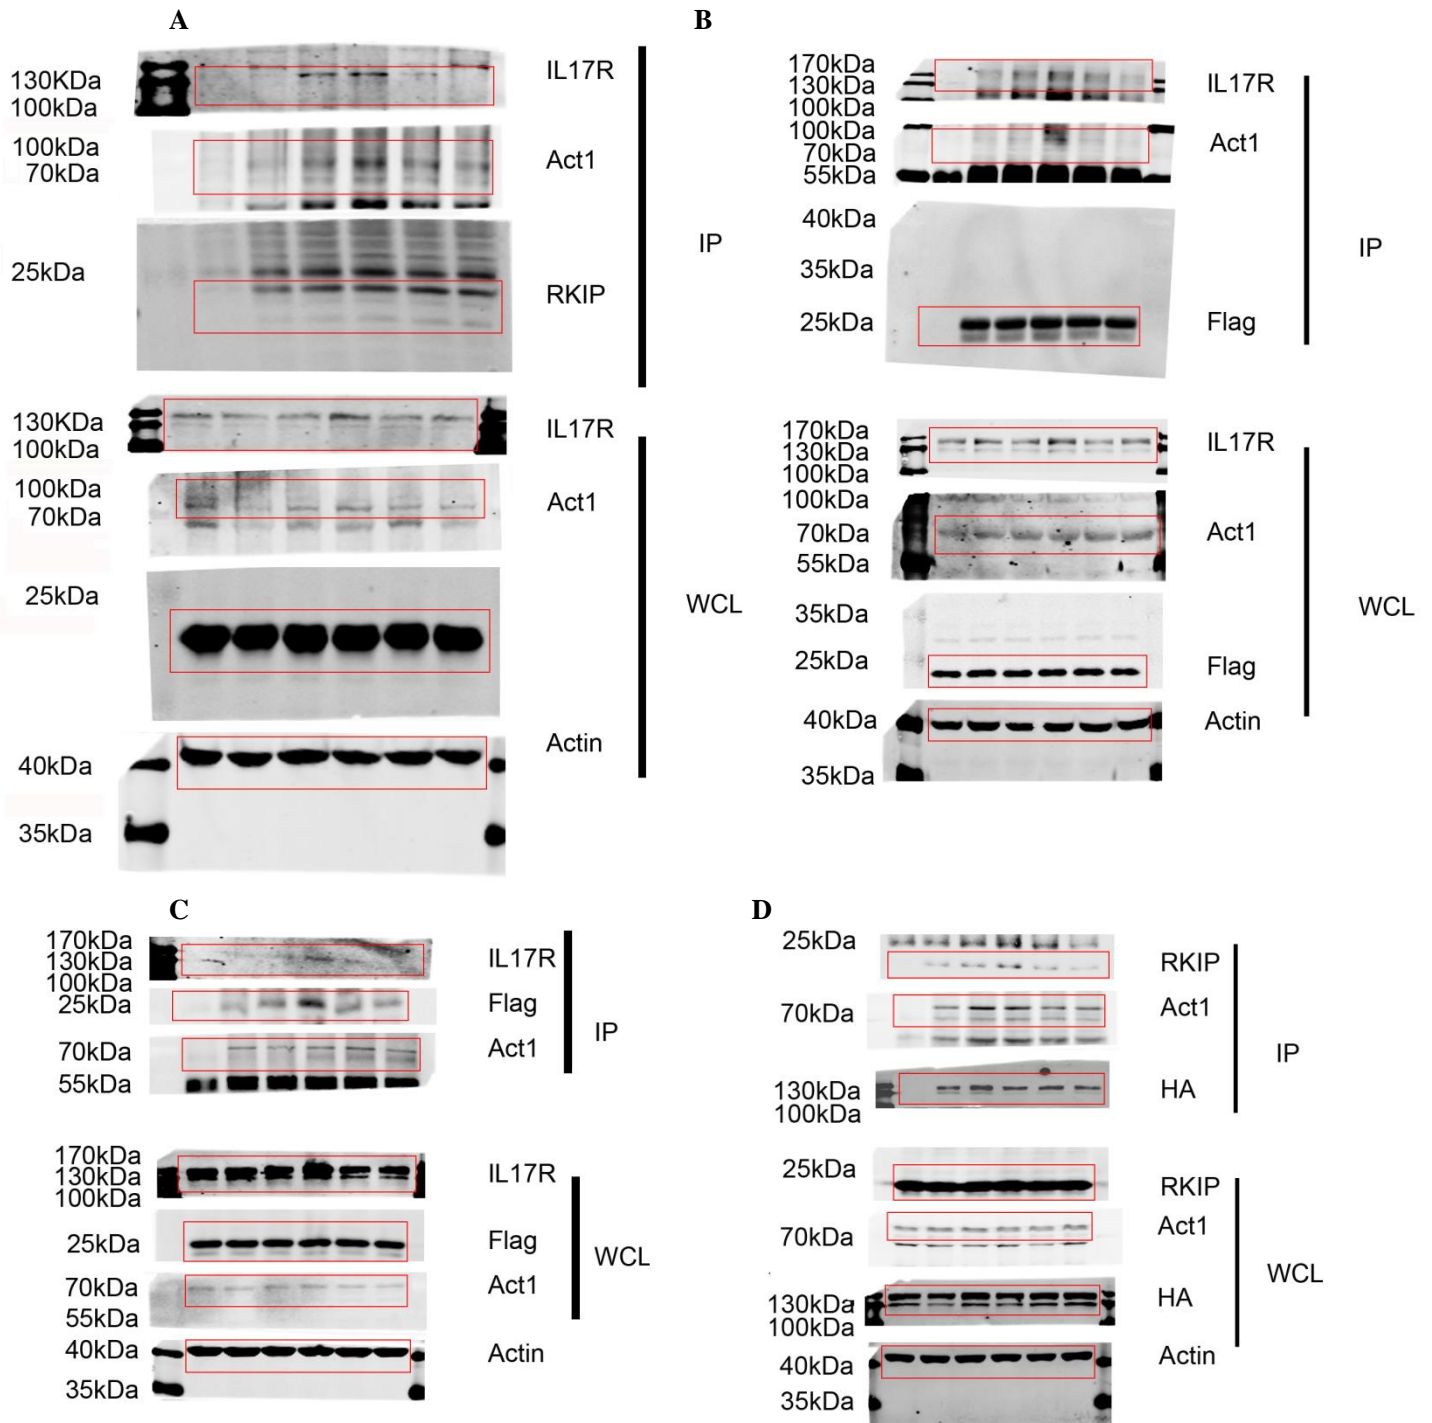

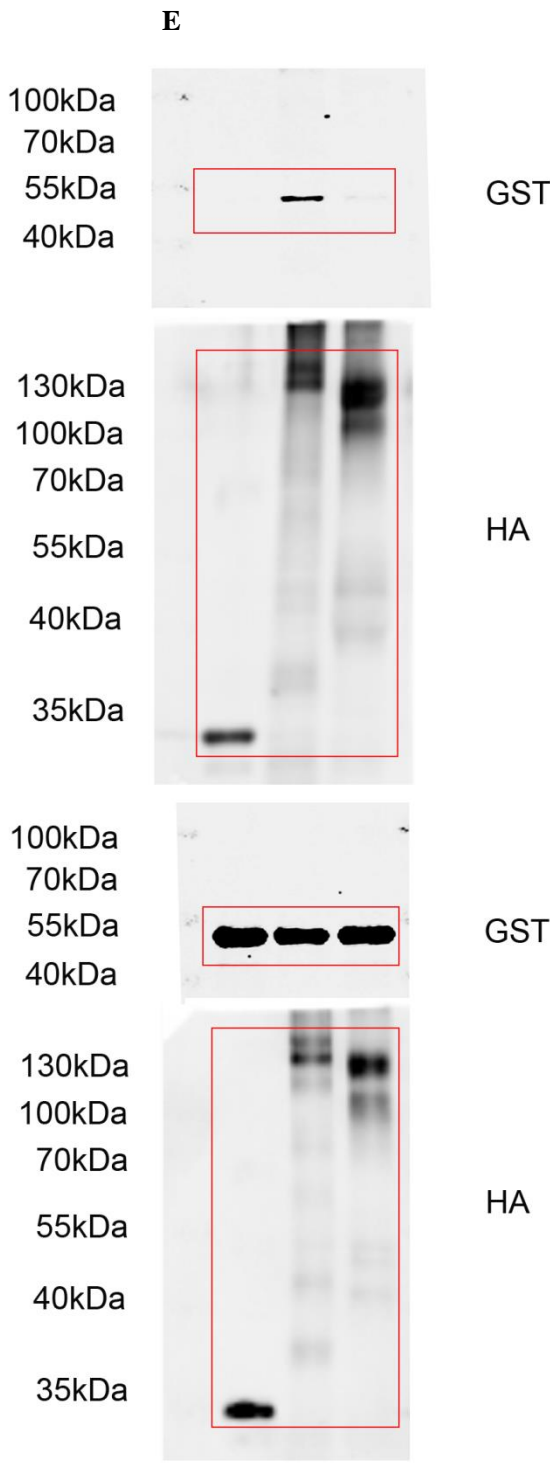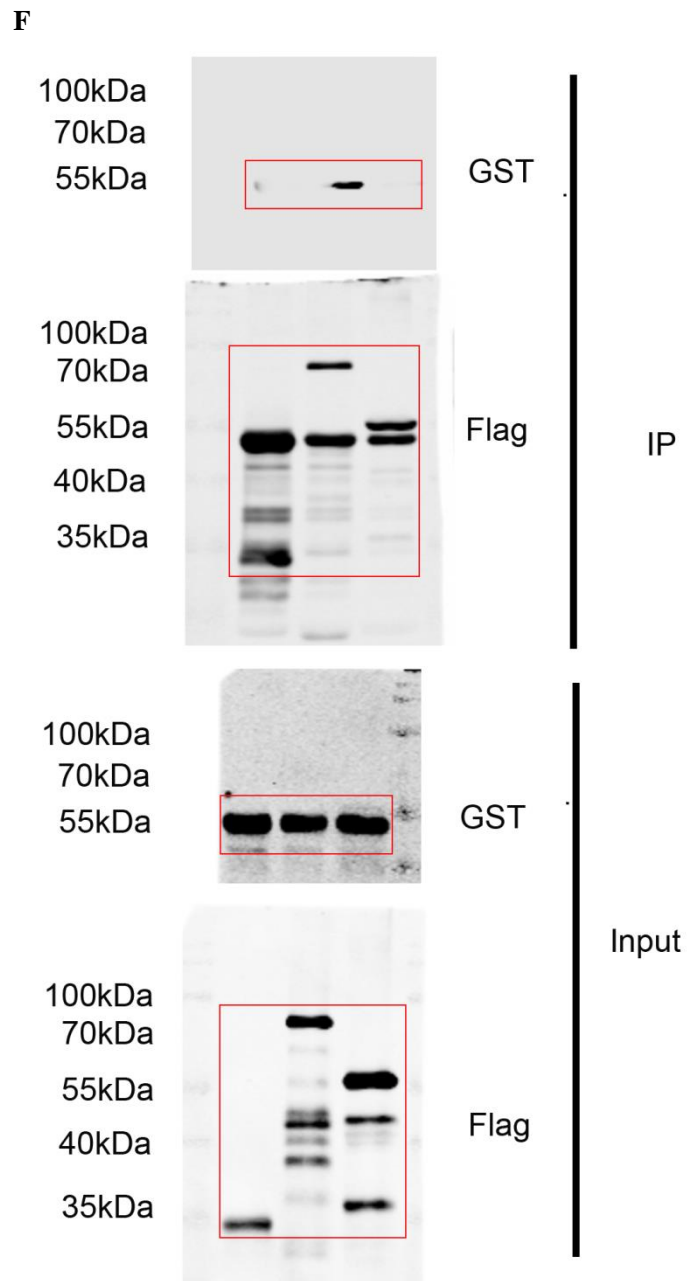

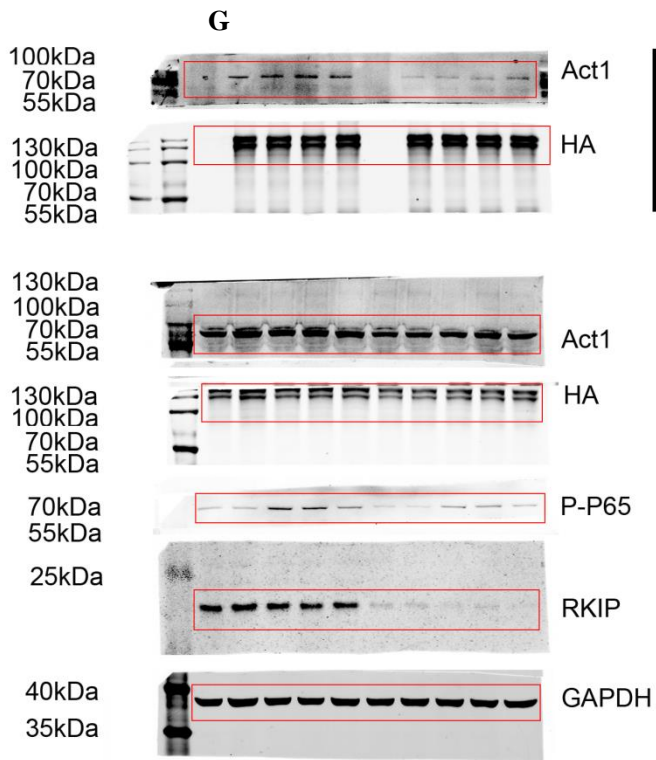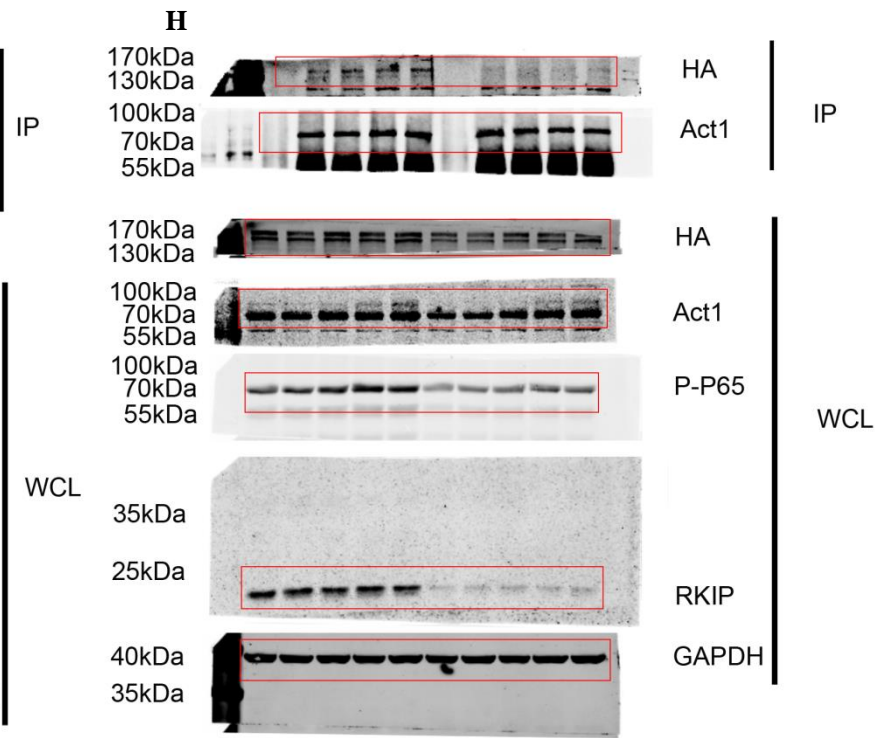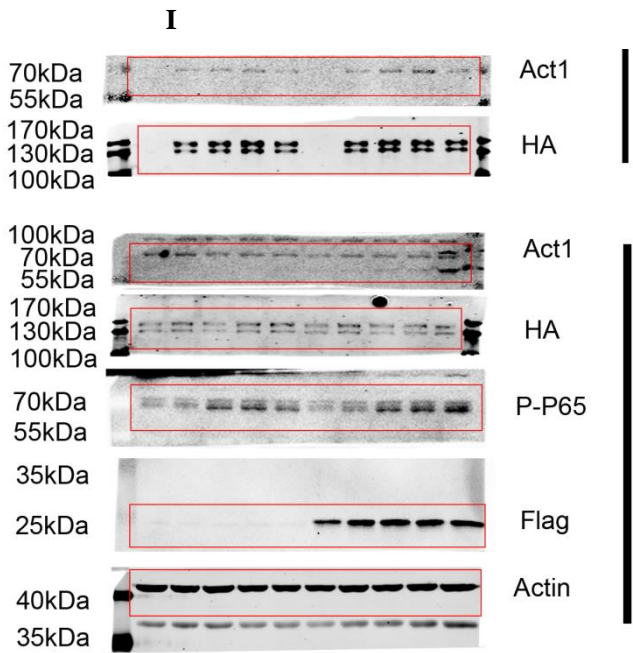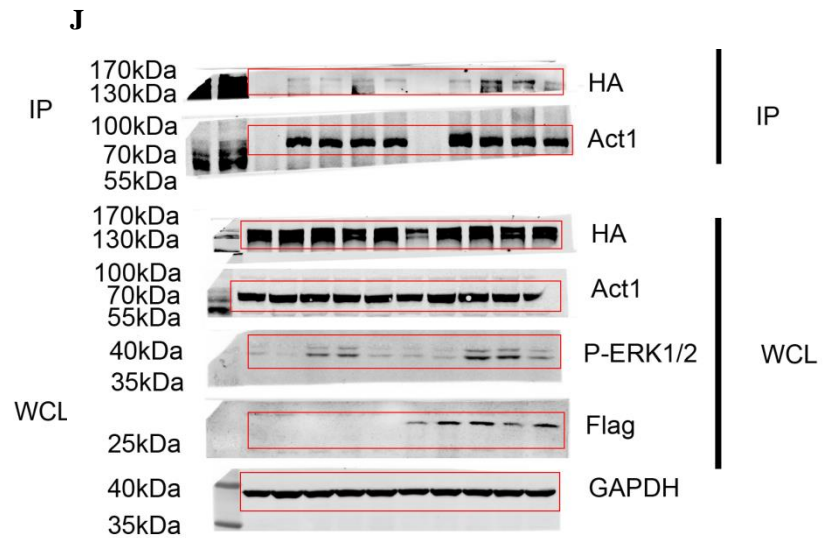

Supplement: EMBR-19-e44951-s004.pdf [file EMBR-19-e44951-s004.pdf]
